# Supplementary material
Source: ML conference proceedings conference paper supplement (https://openreview.net/forum?id=cRs4jvF4mO)
Supplement: supplementary_material [file attachment]

# Classification

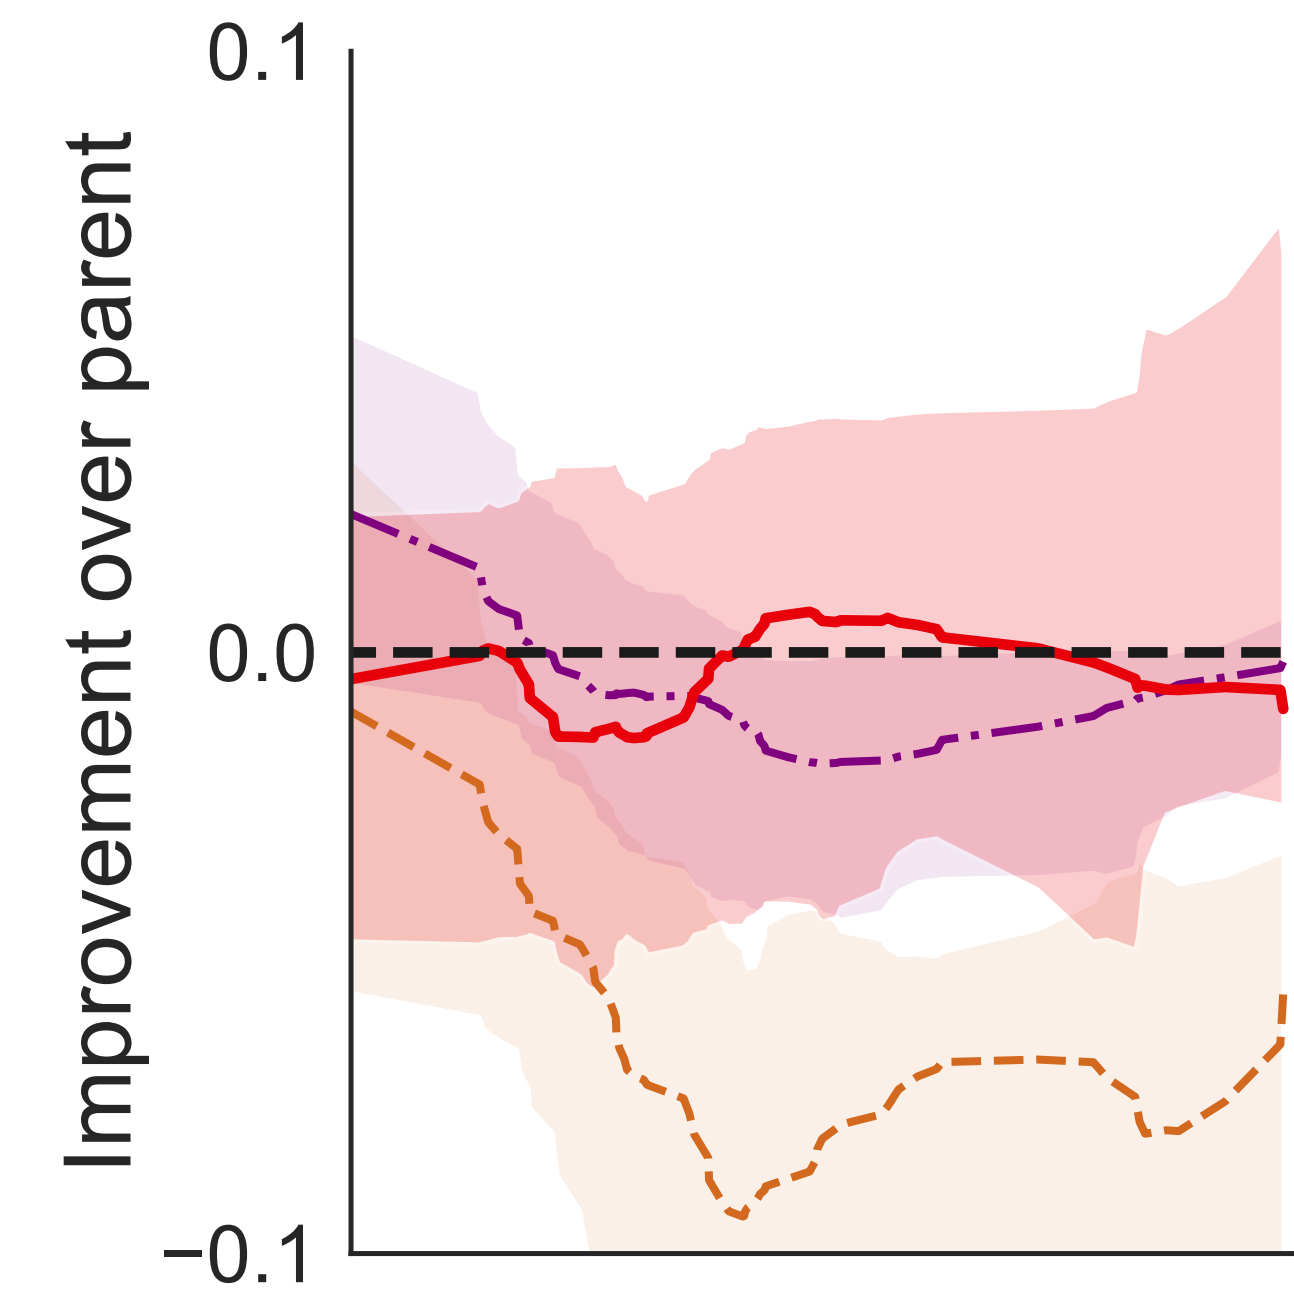

# ID Calibration

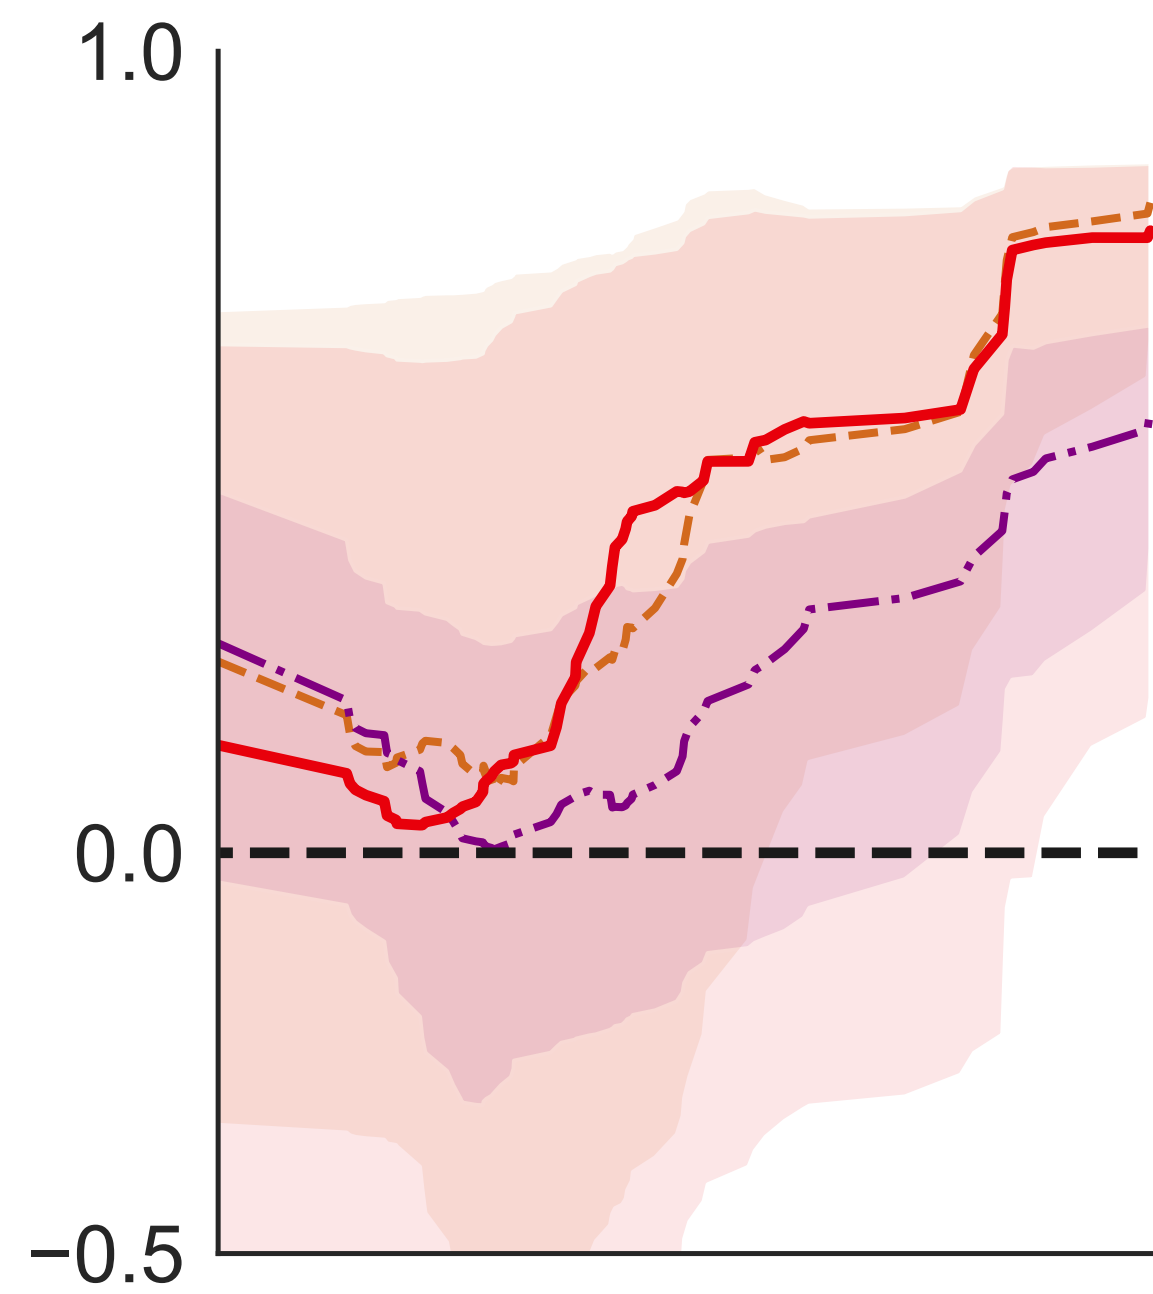

# OOD Calibration

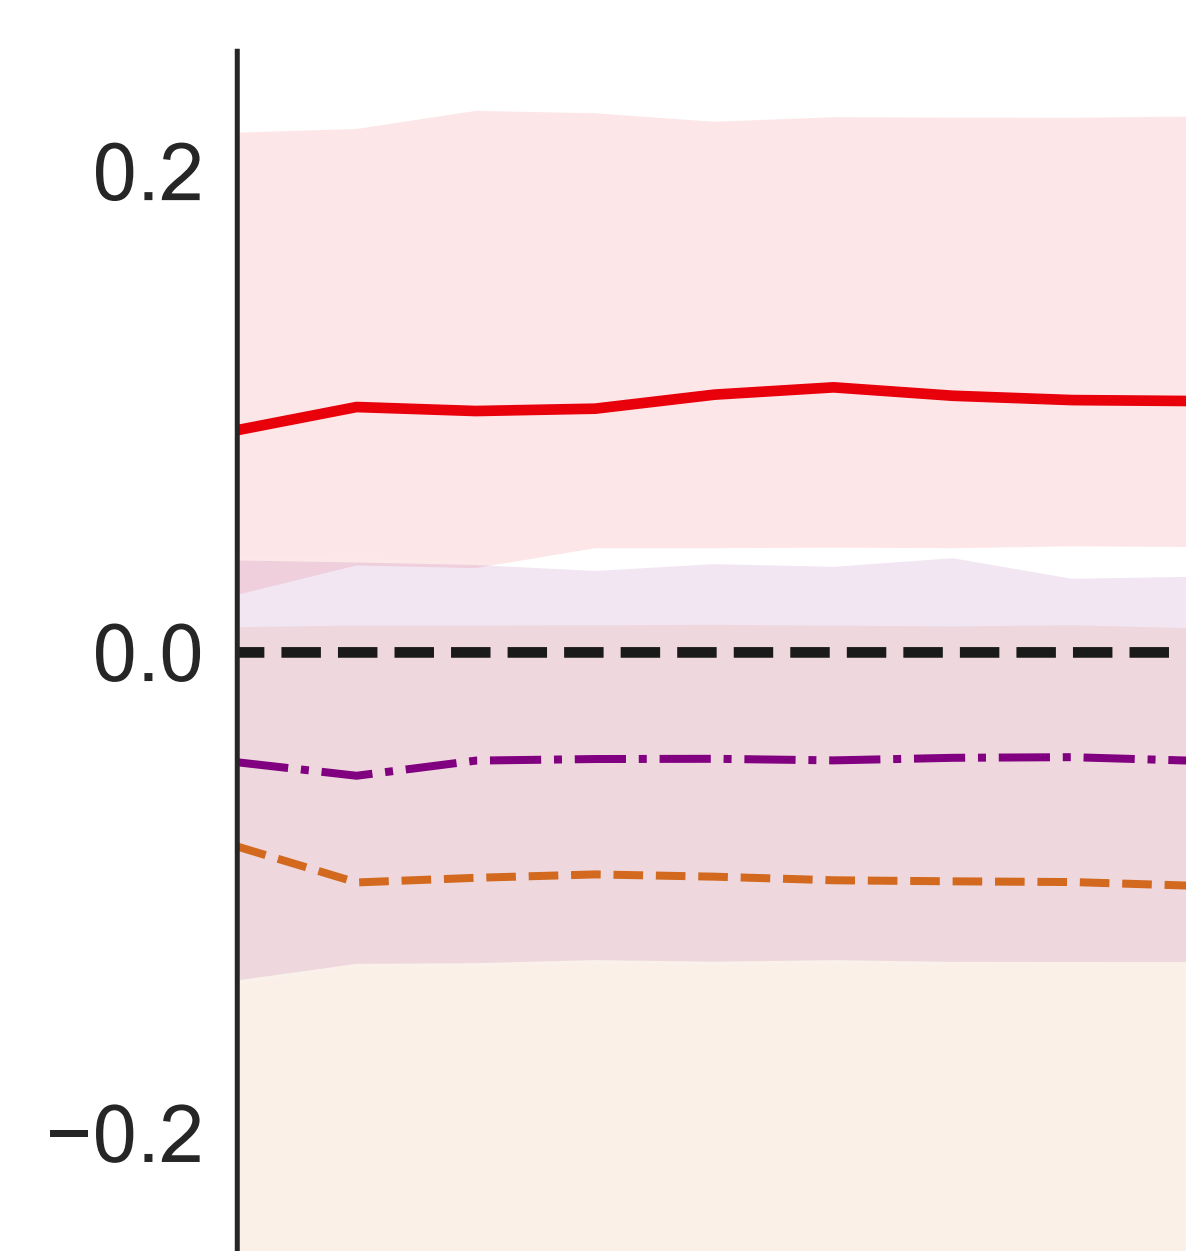

- KDF
- Isotonic RF
- Sigmoid RF
- Parent RF

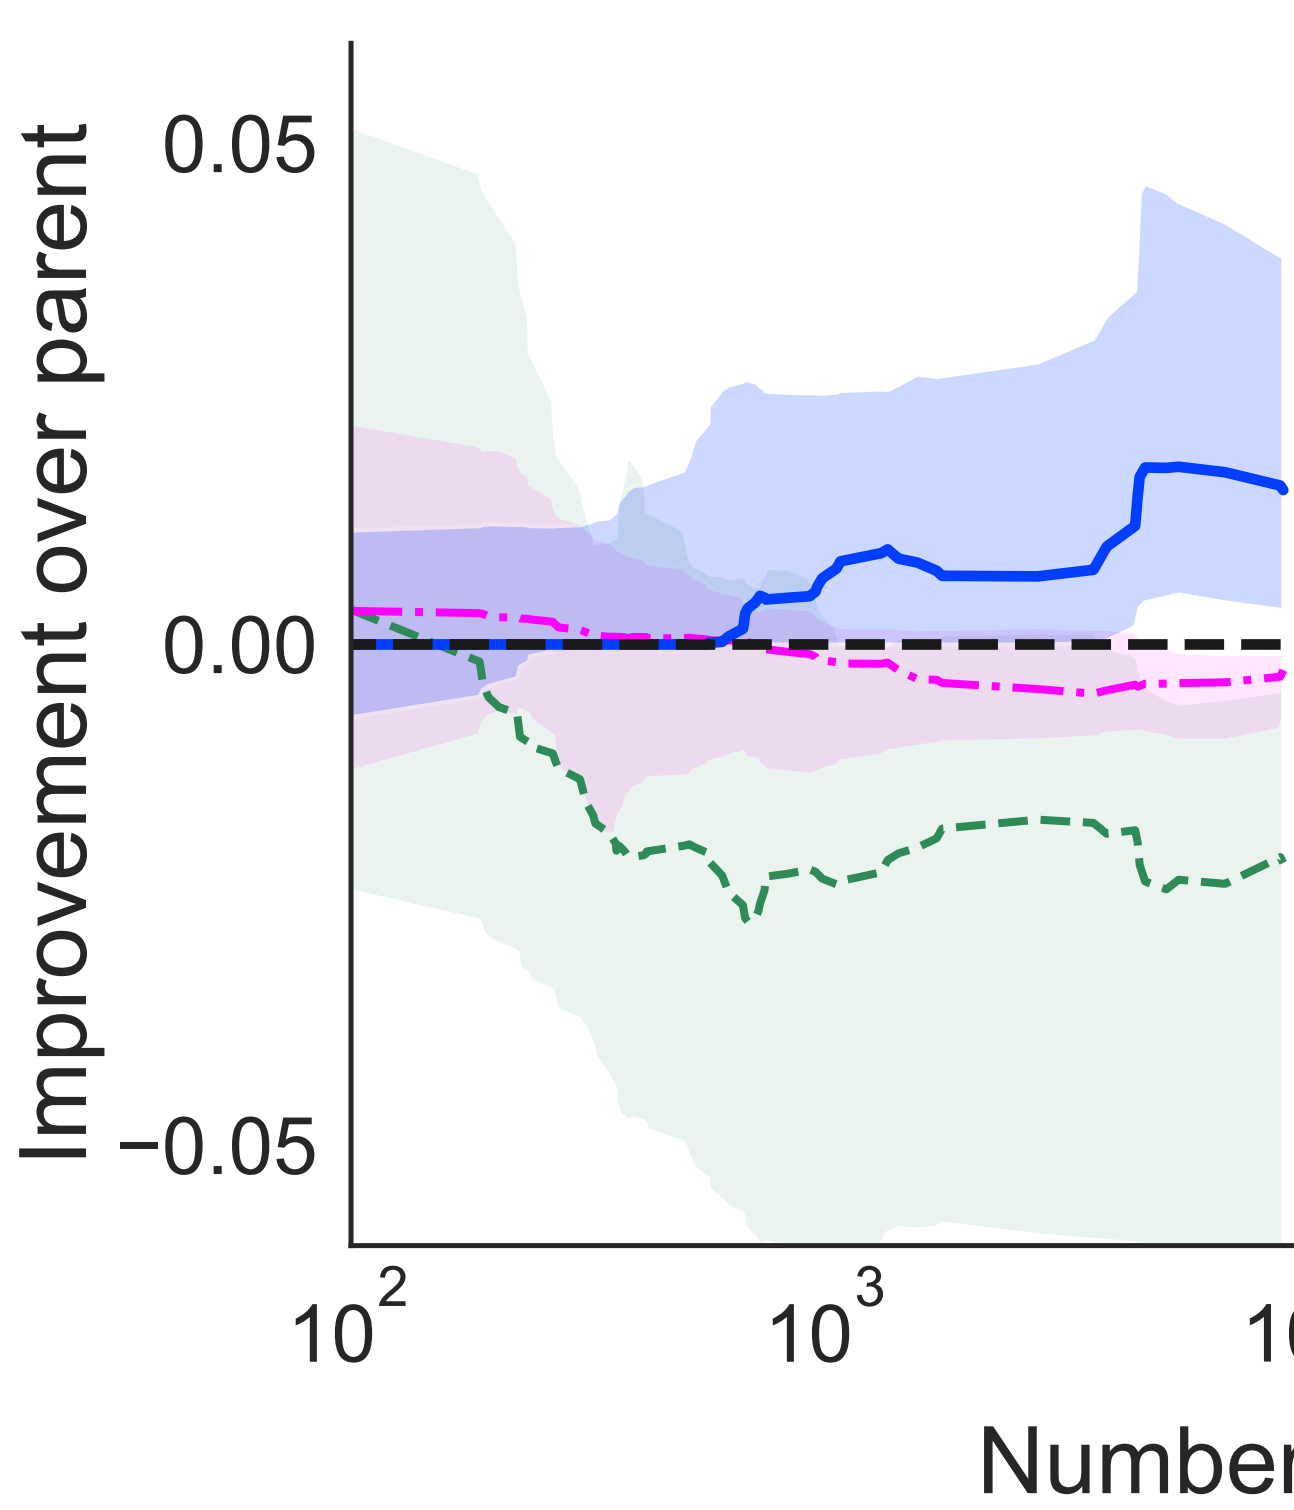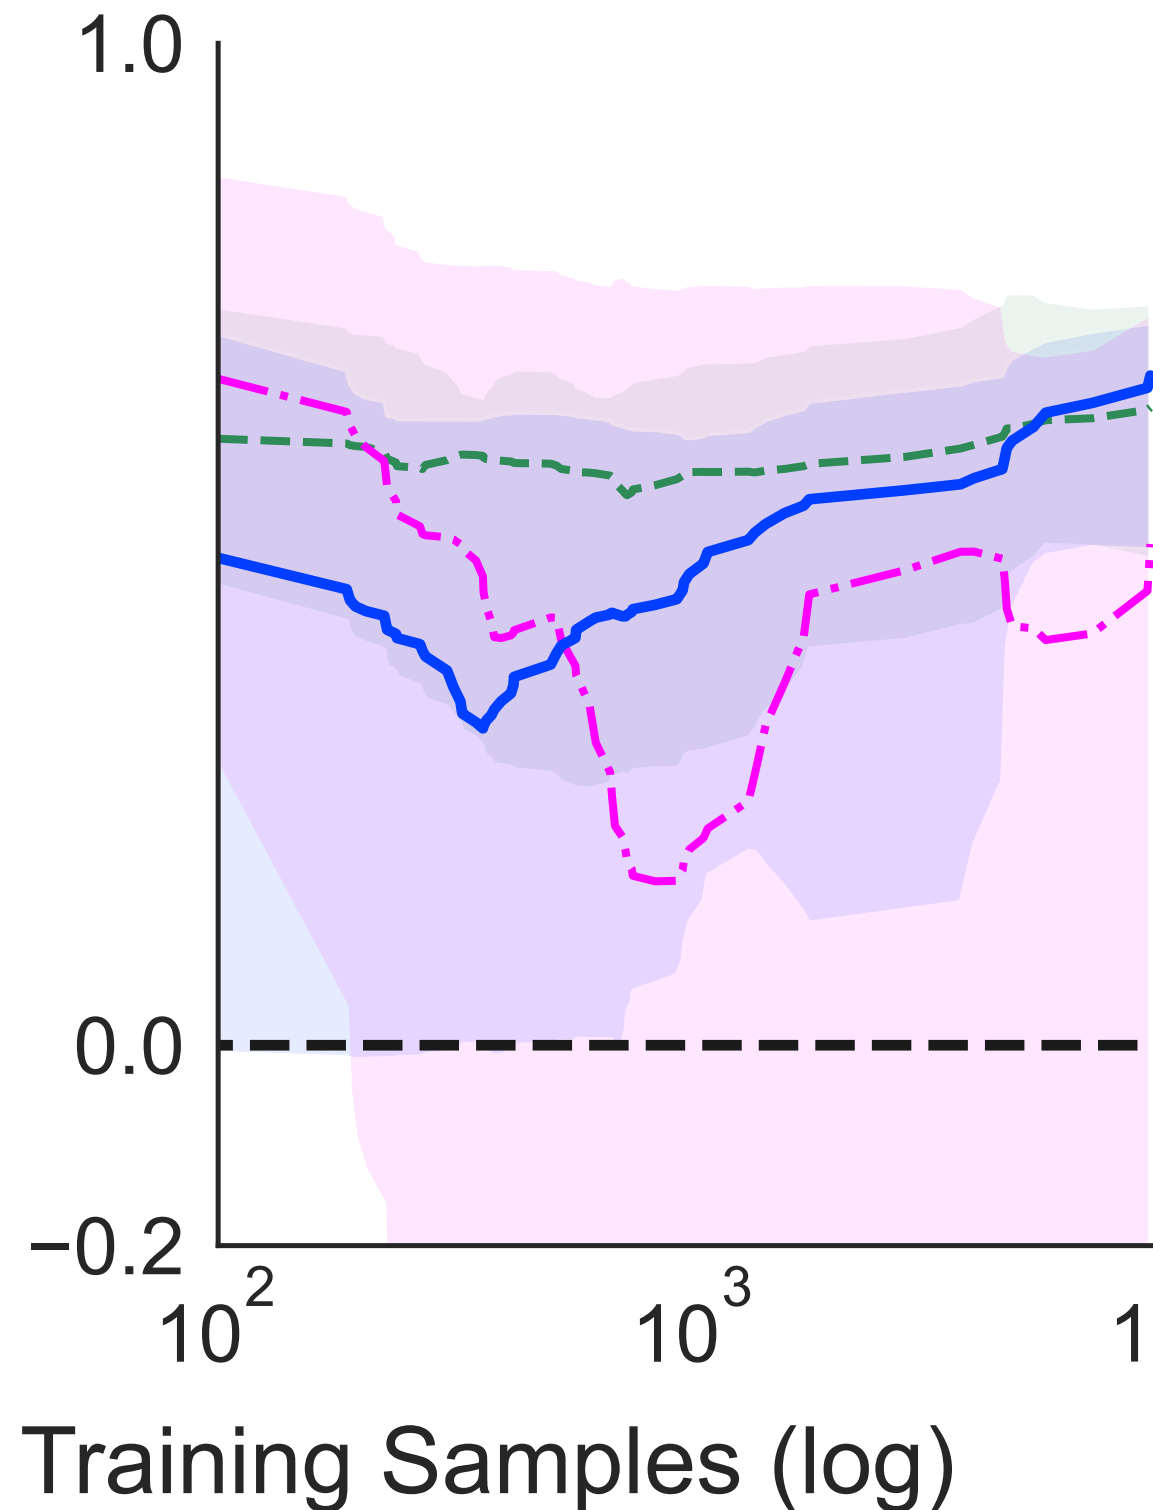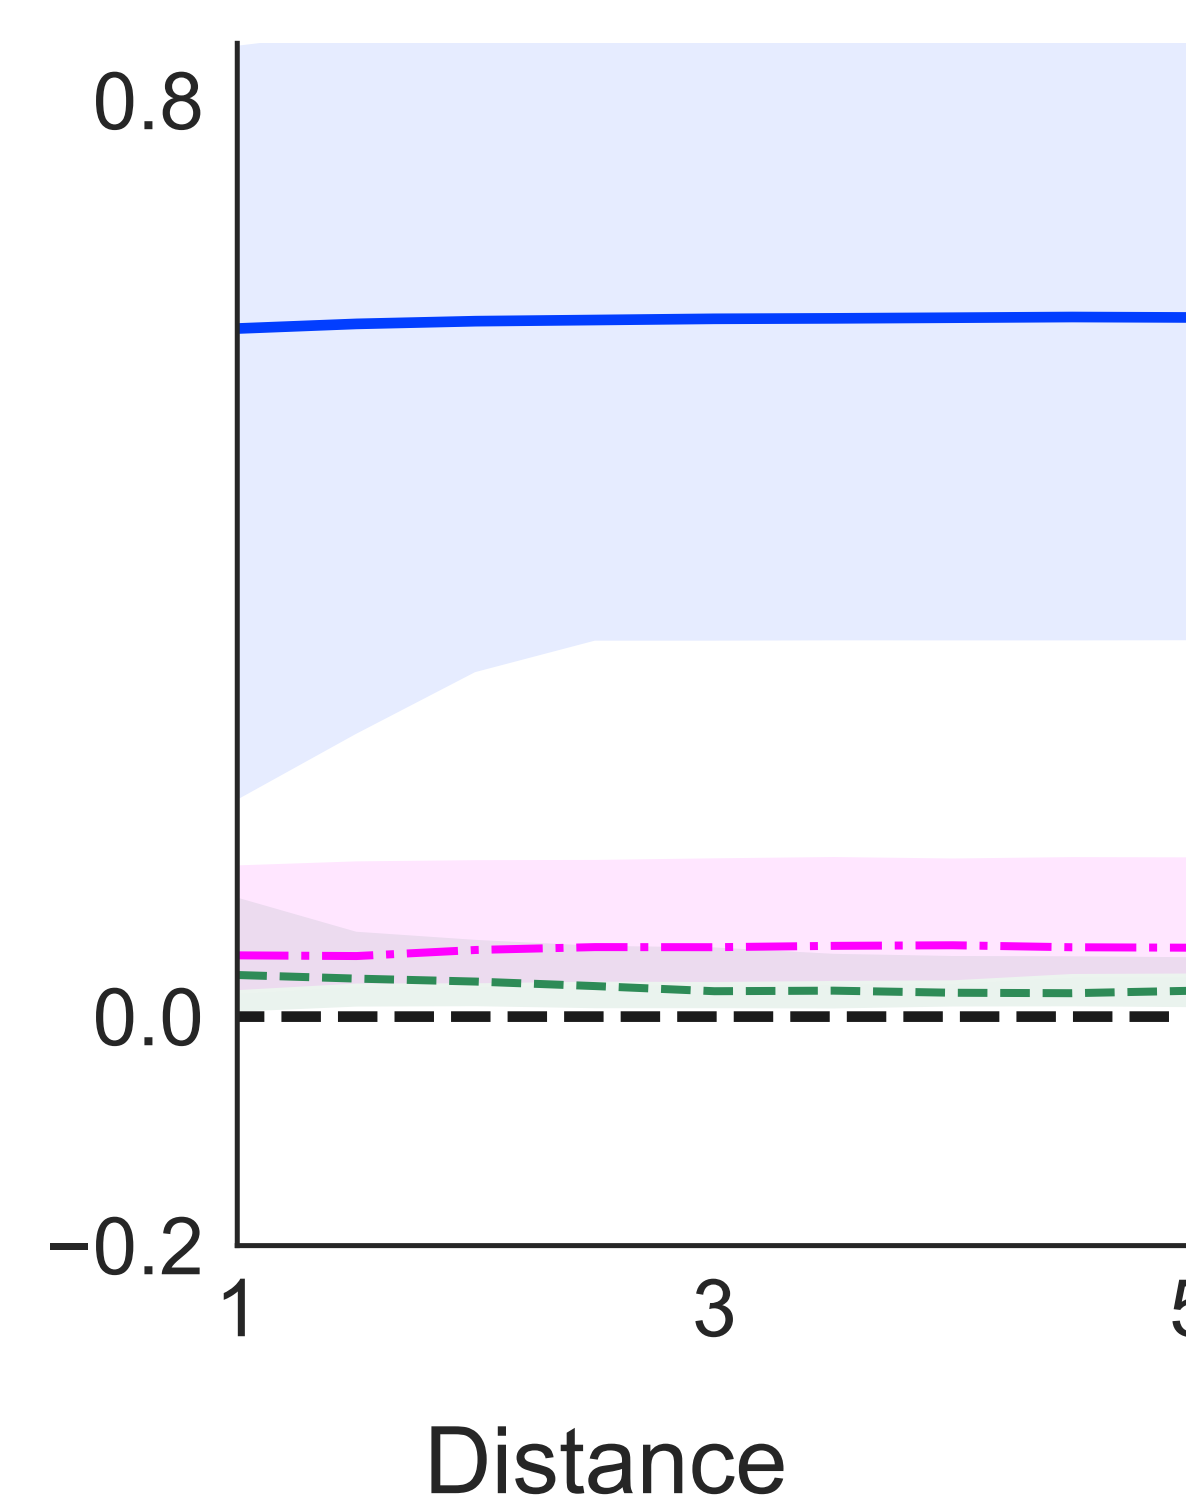

- KDN
- Isotonic DN
- Sigmoid DN
- Parent DN
