# Supplementary material
Source: ML conference proceedings conference paper supplement (https://openreview.net/forum?id=cRs4jvF4mO)

# KDF and RF

# KDN and DN

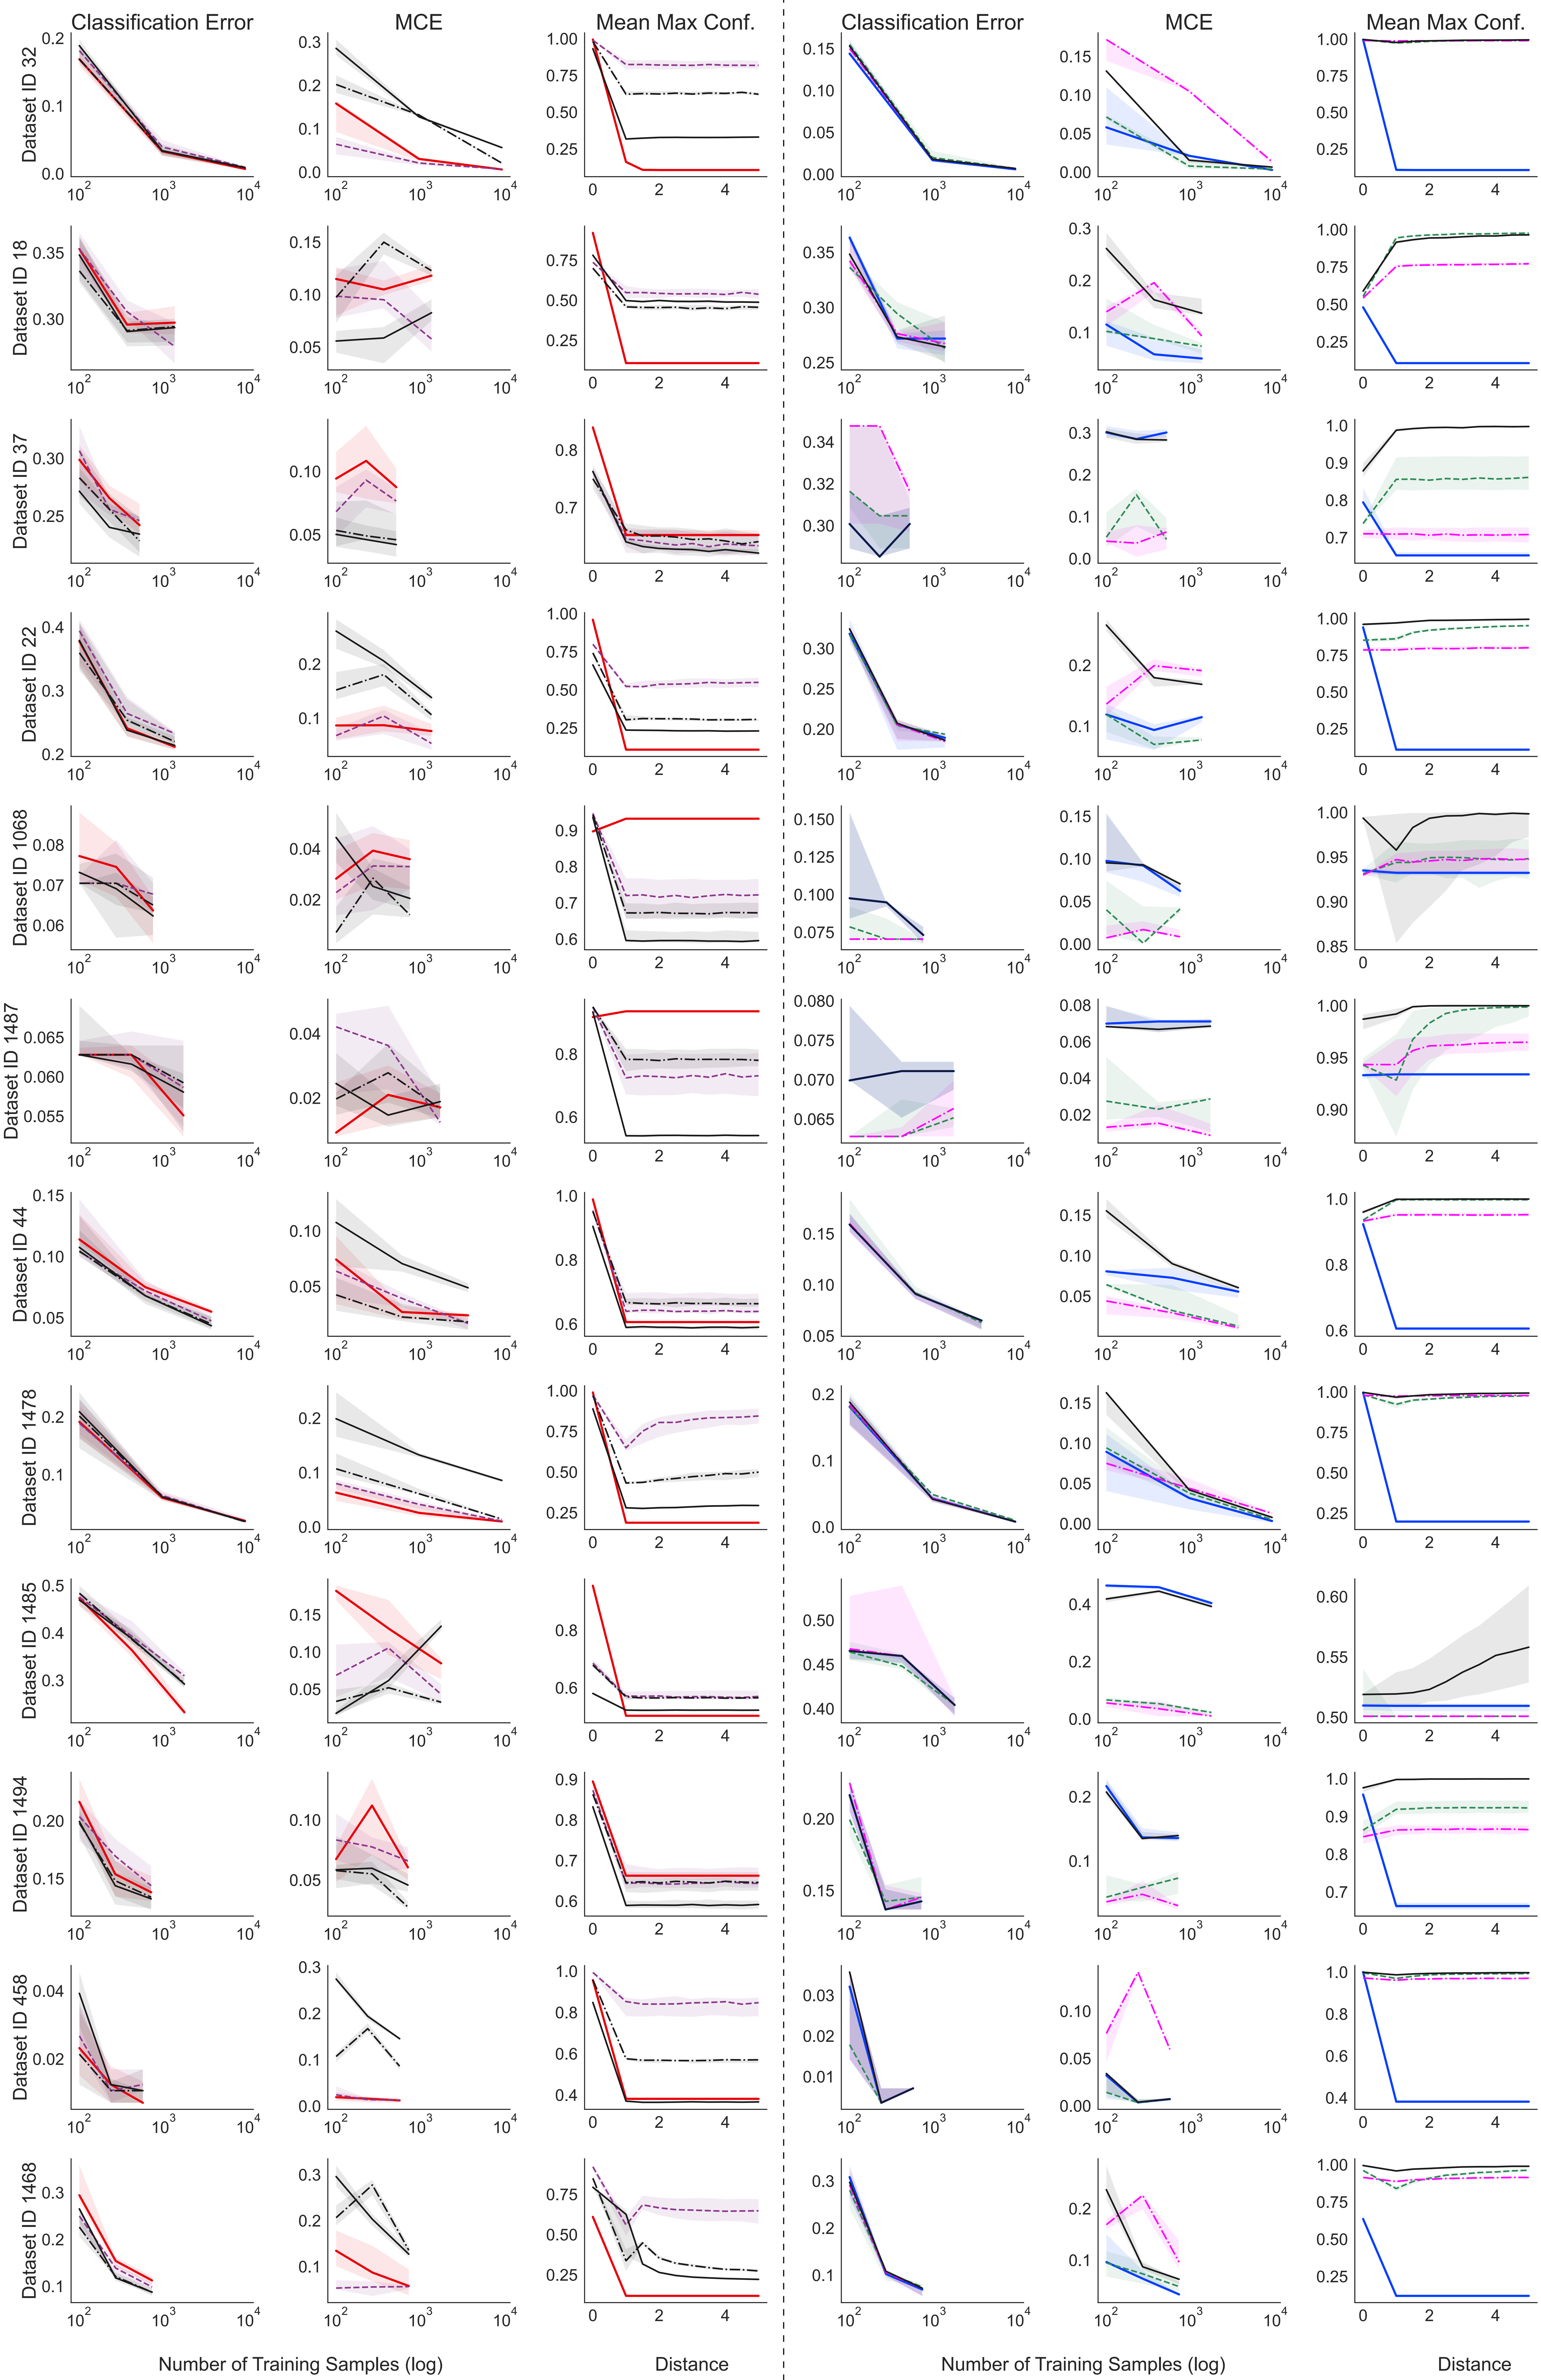

Supplement: supplementary_material [file attachment]

# KDF and RF

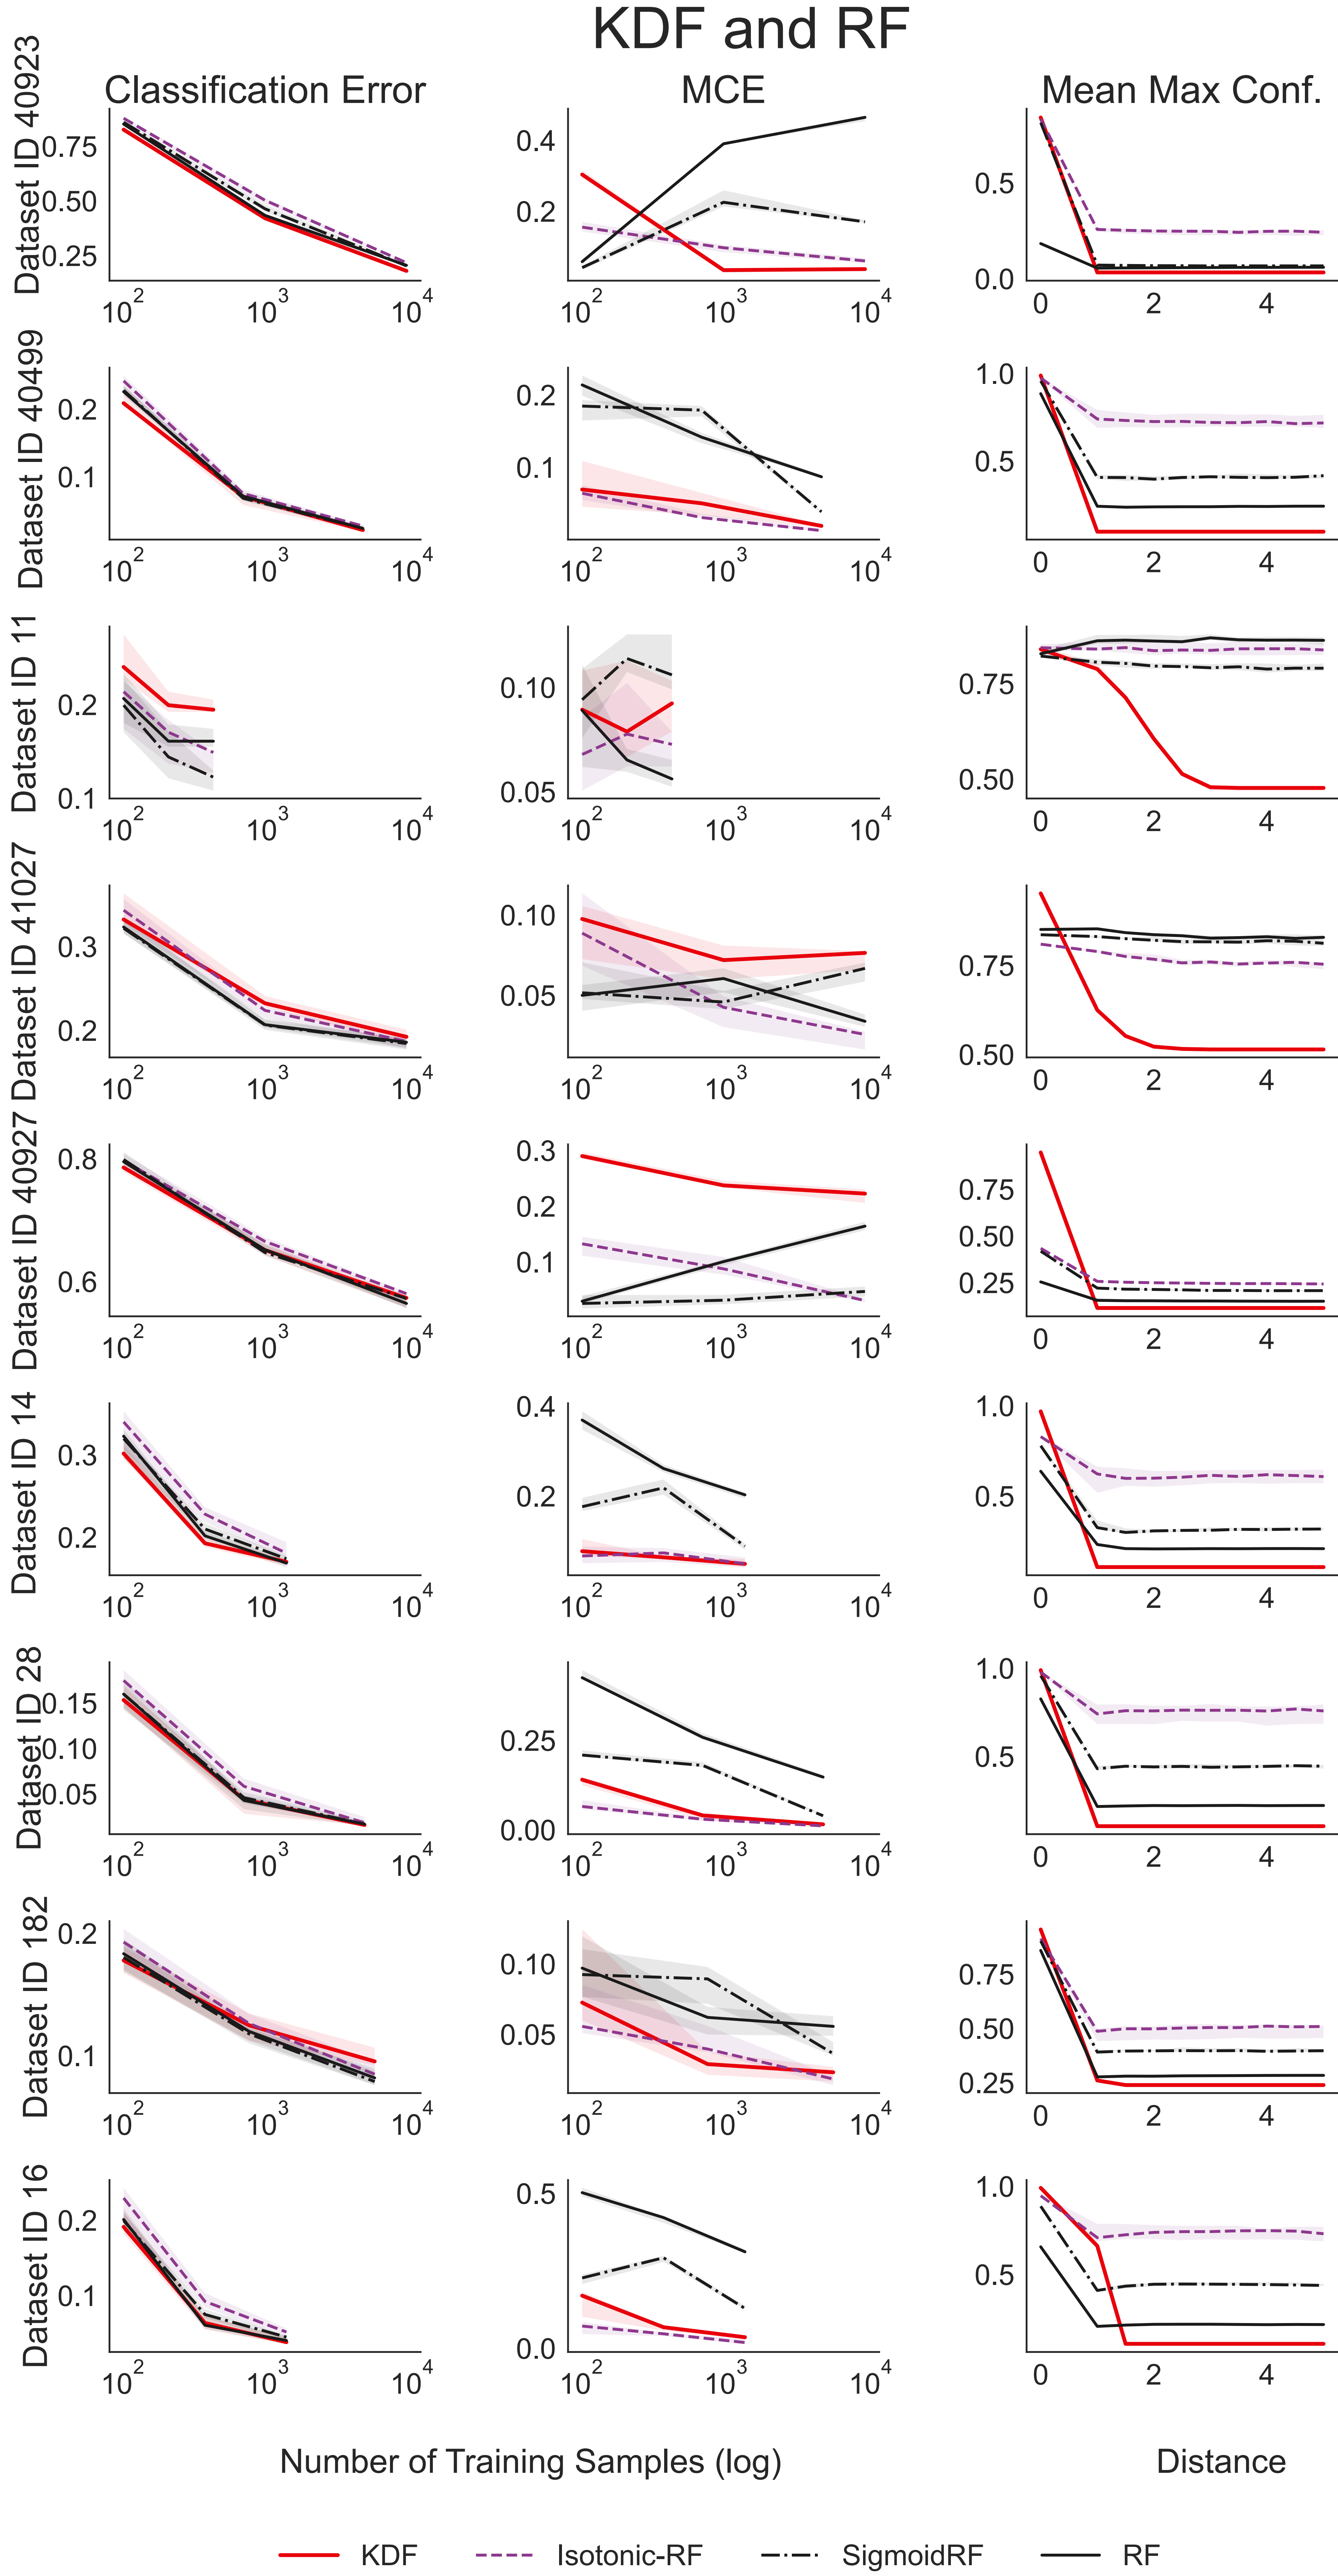

# KDN and DN

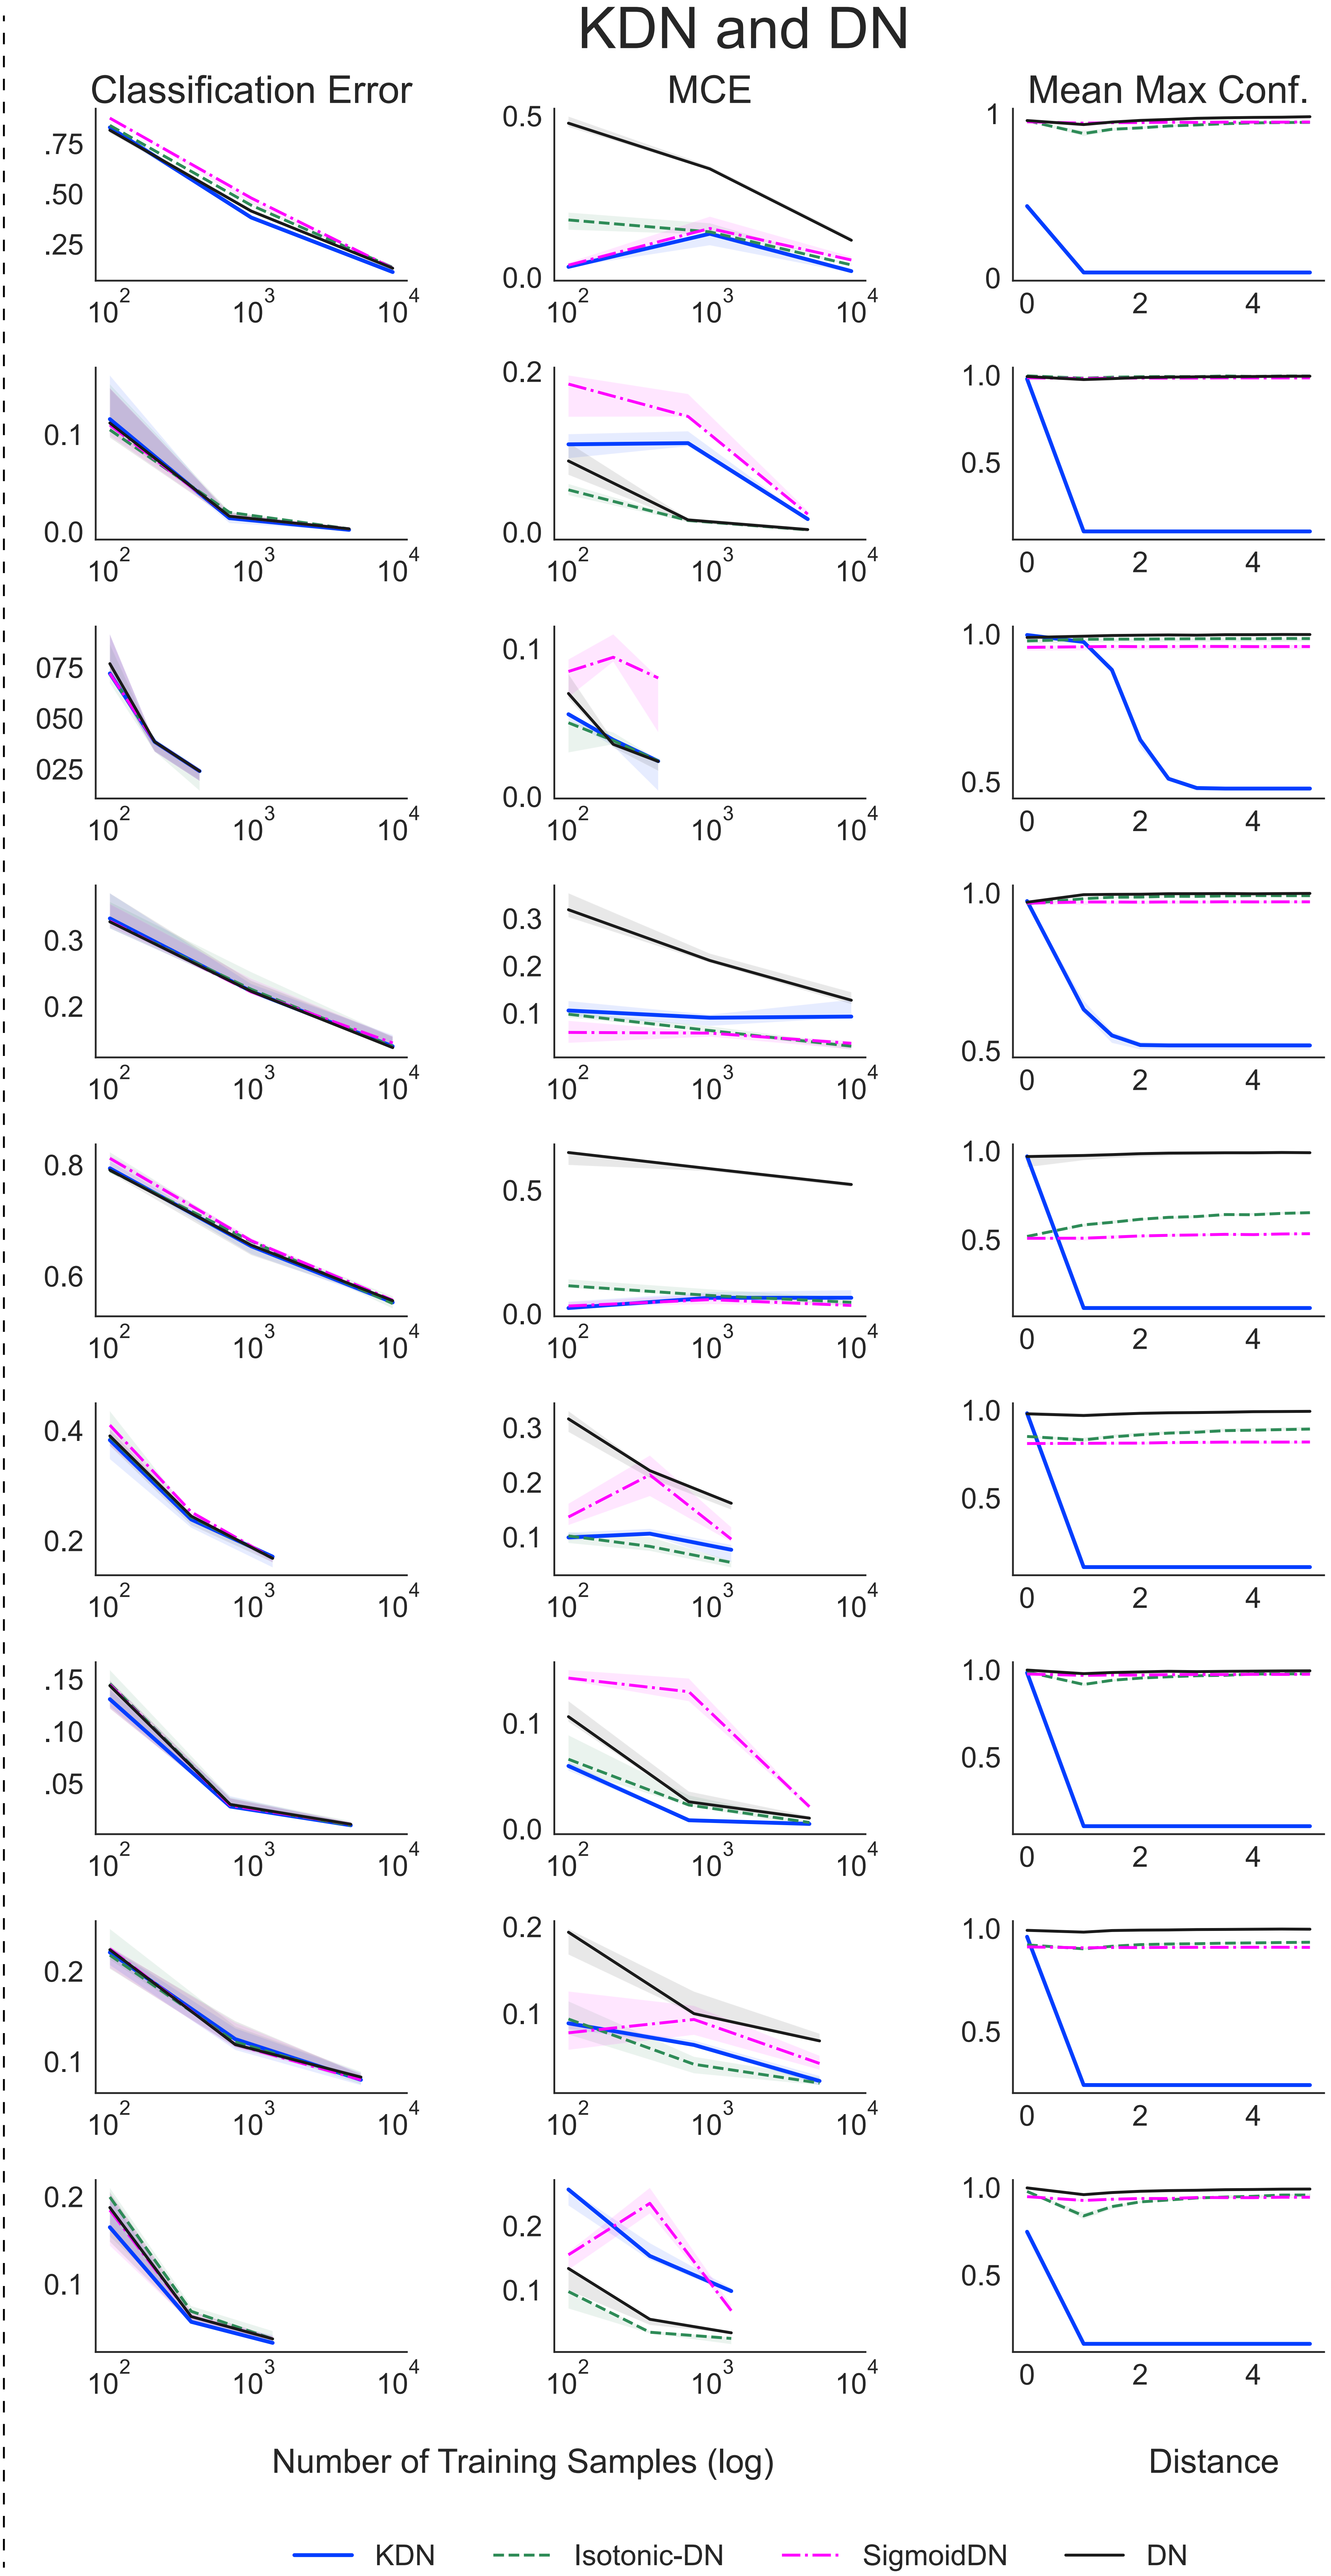

Supplement: supplementary_material [file attachment]

A. Circle (ID)

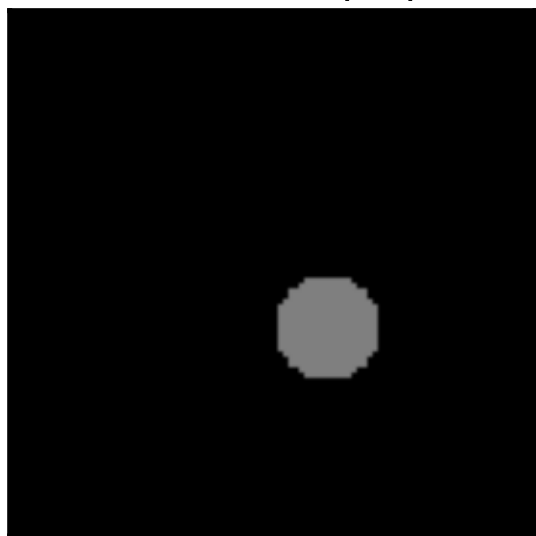

B. Rectangle (ID)

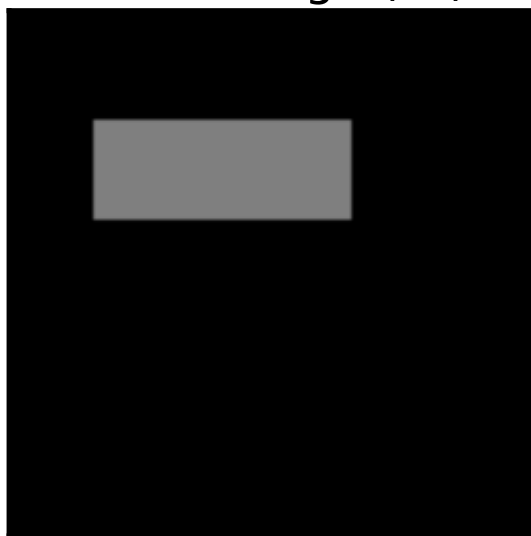

C. Ellipse (OOD)

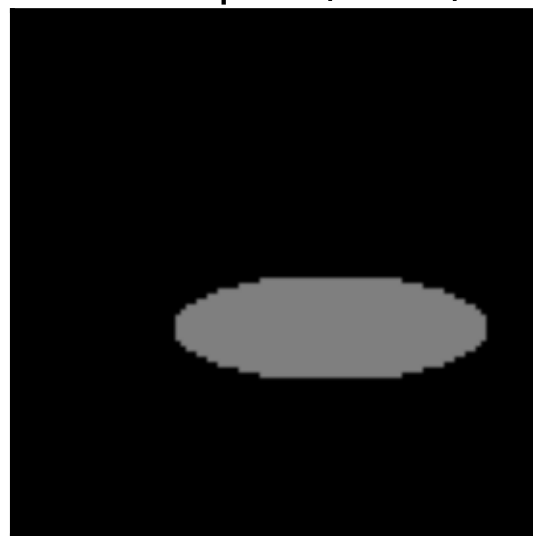

D.

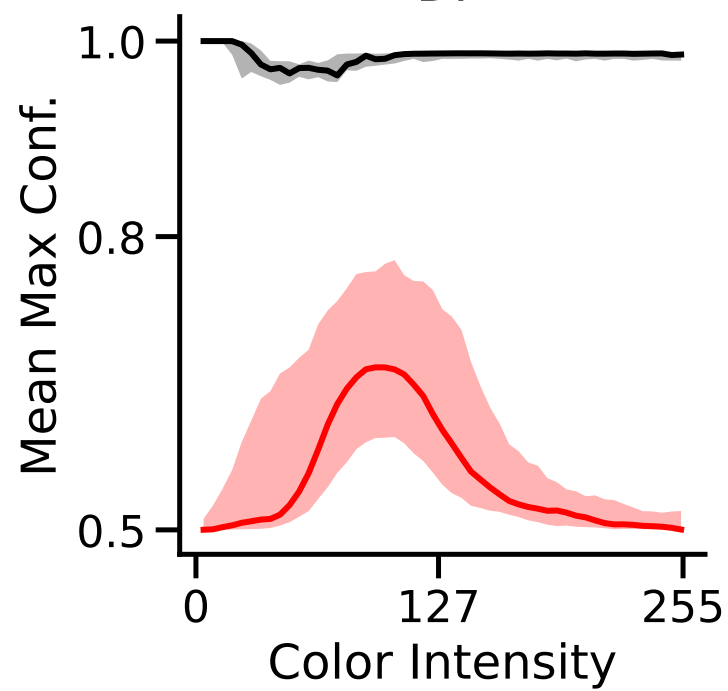

E.

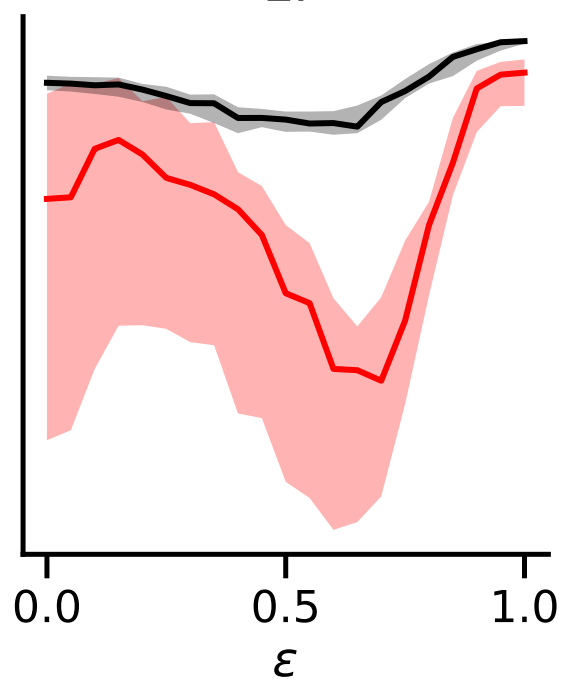

F.

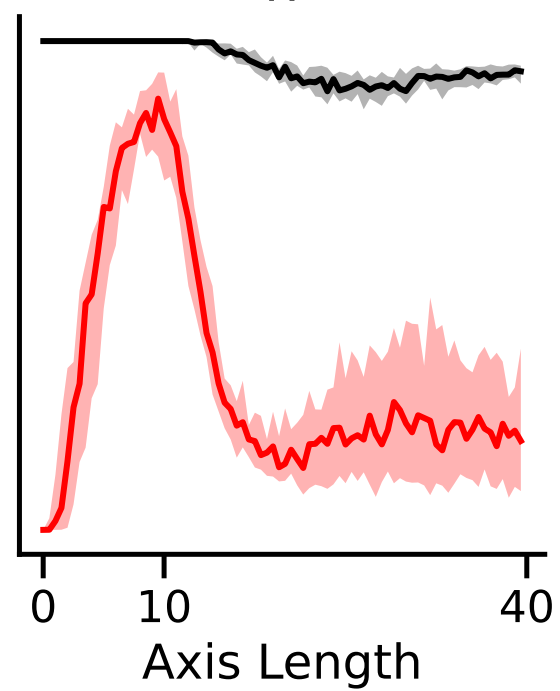

— KDN — CNN

Supplement: supplementary_material [file attachment]

# KDF and RF

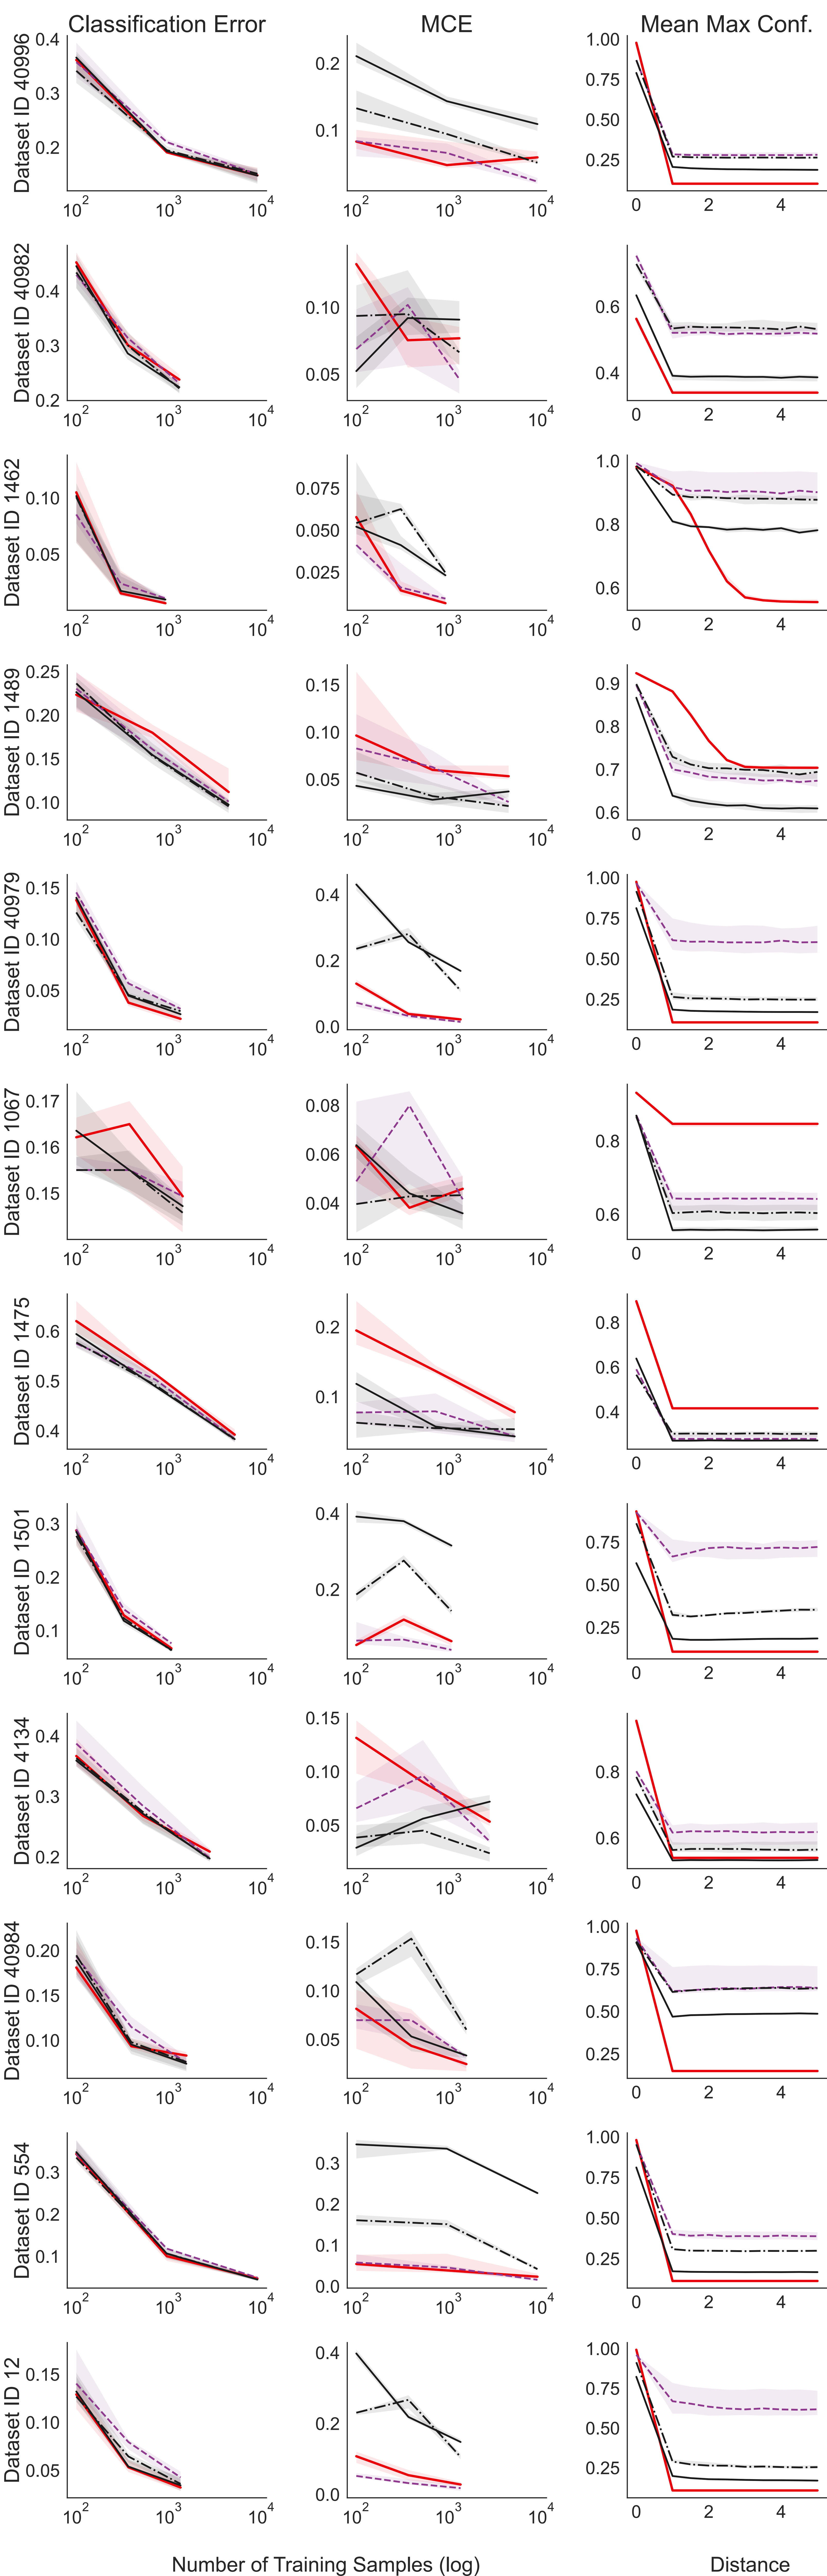

# KDN and DN

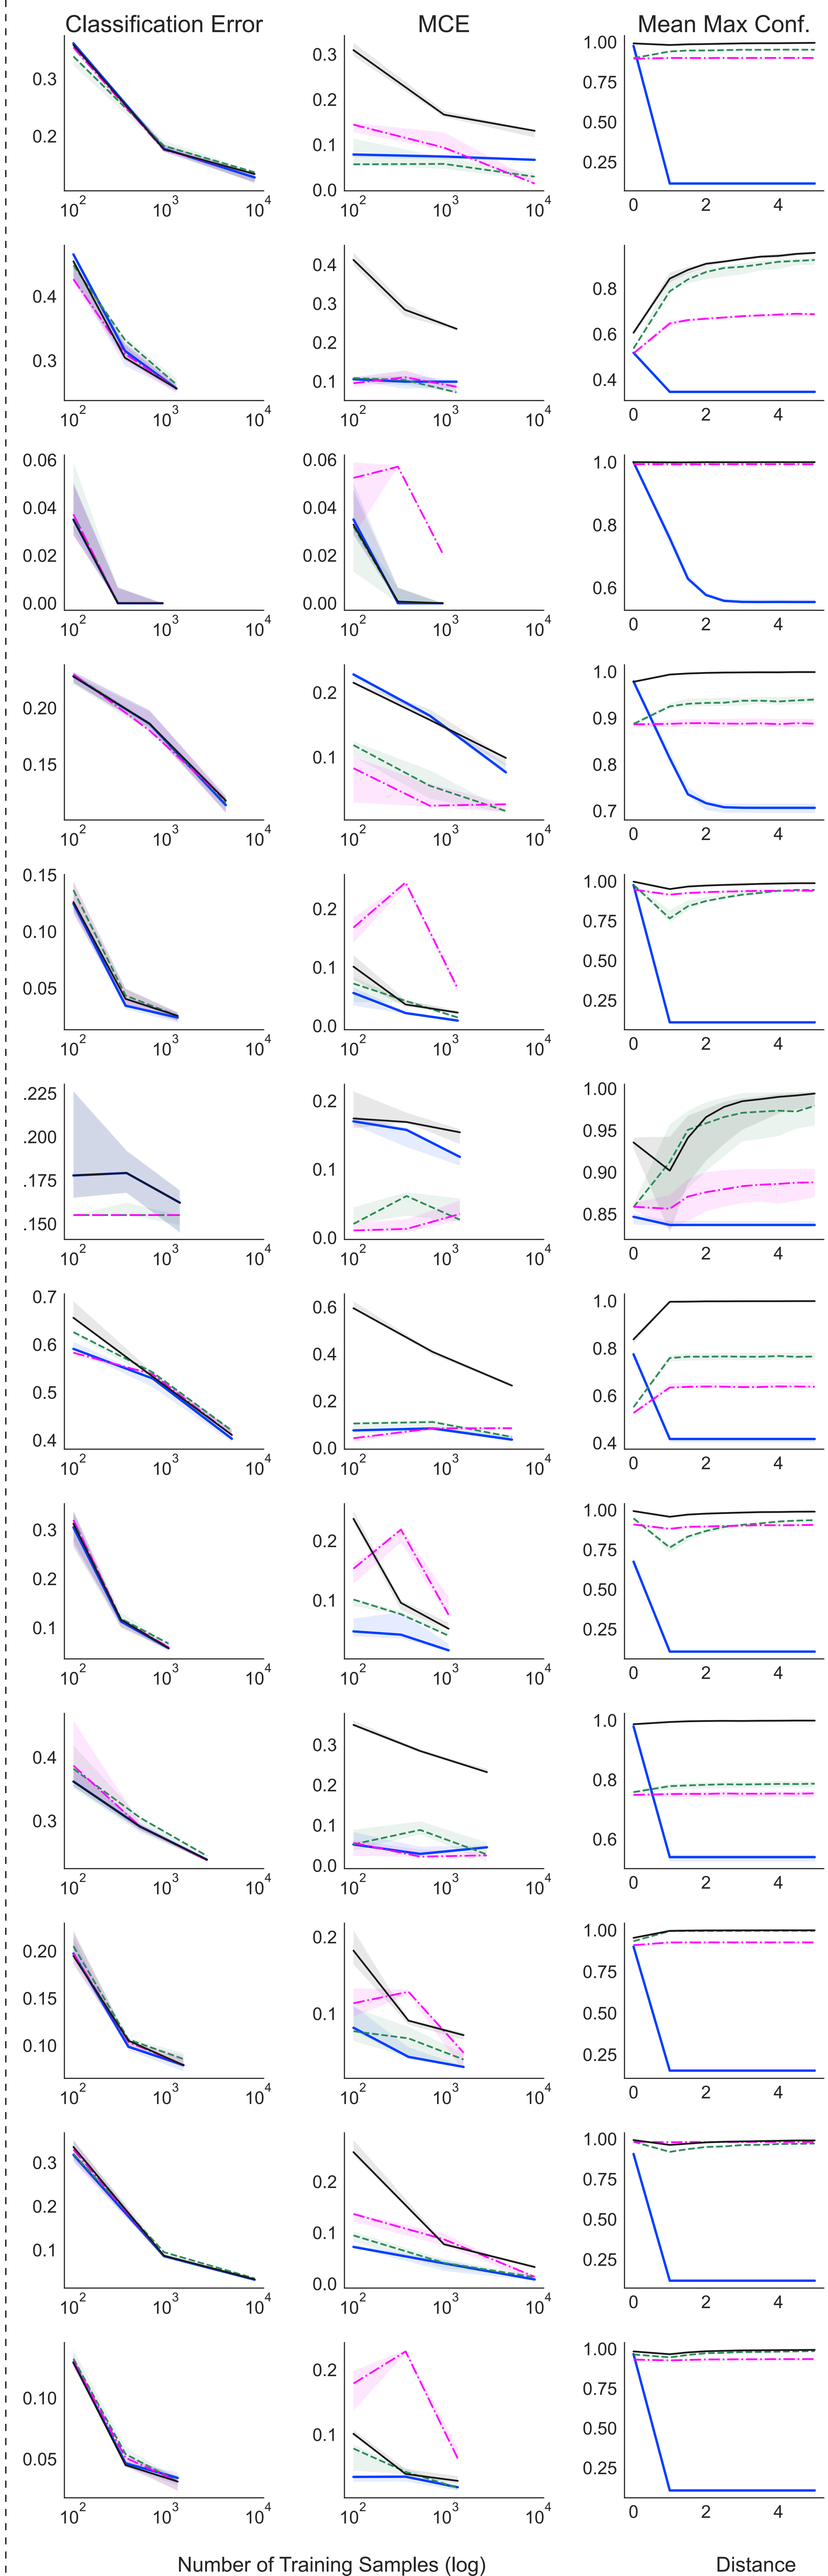

Supplement: supplementary_material [file attachment]

# KDF and RF

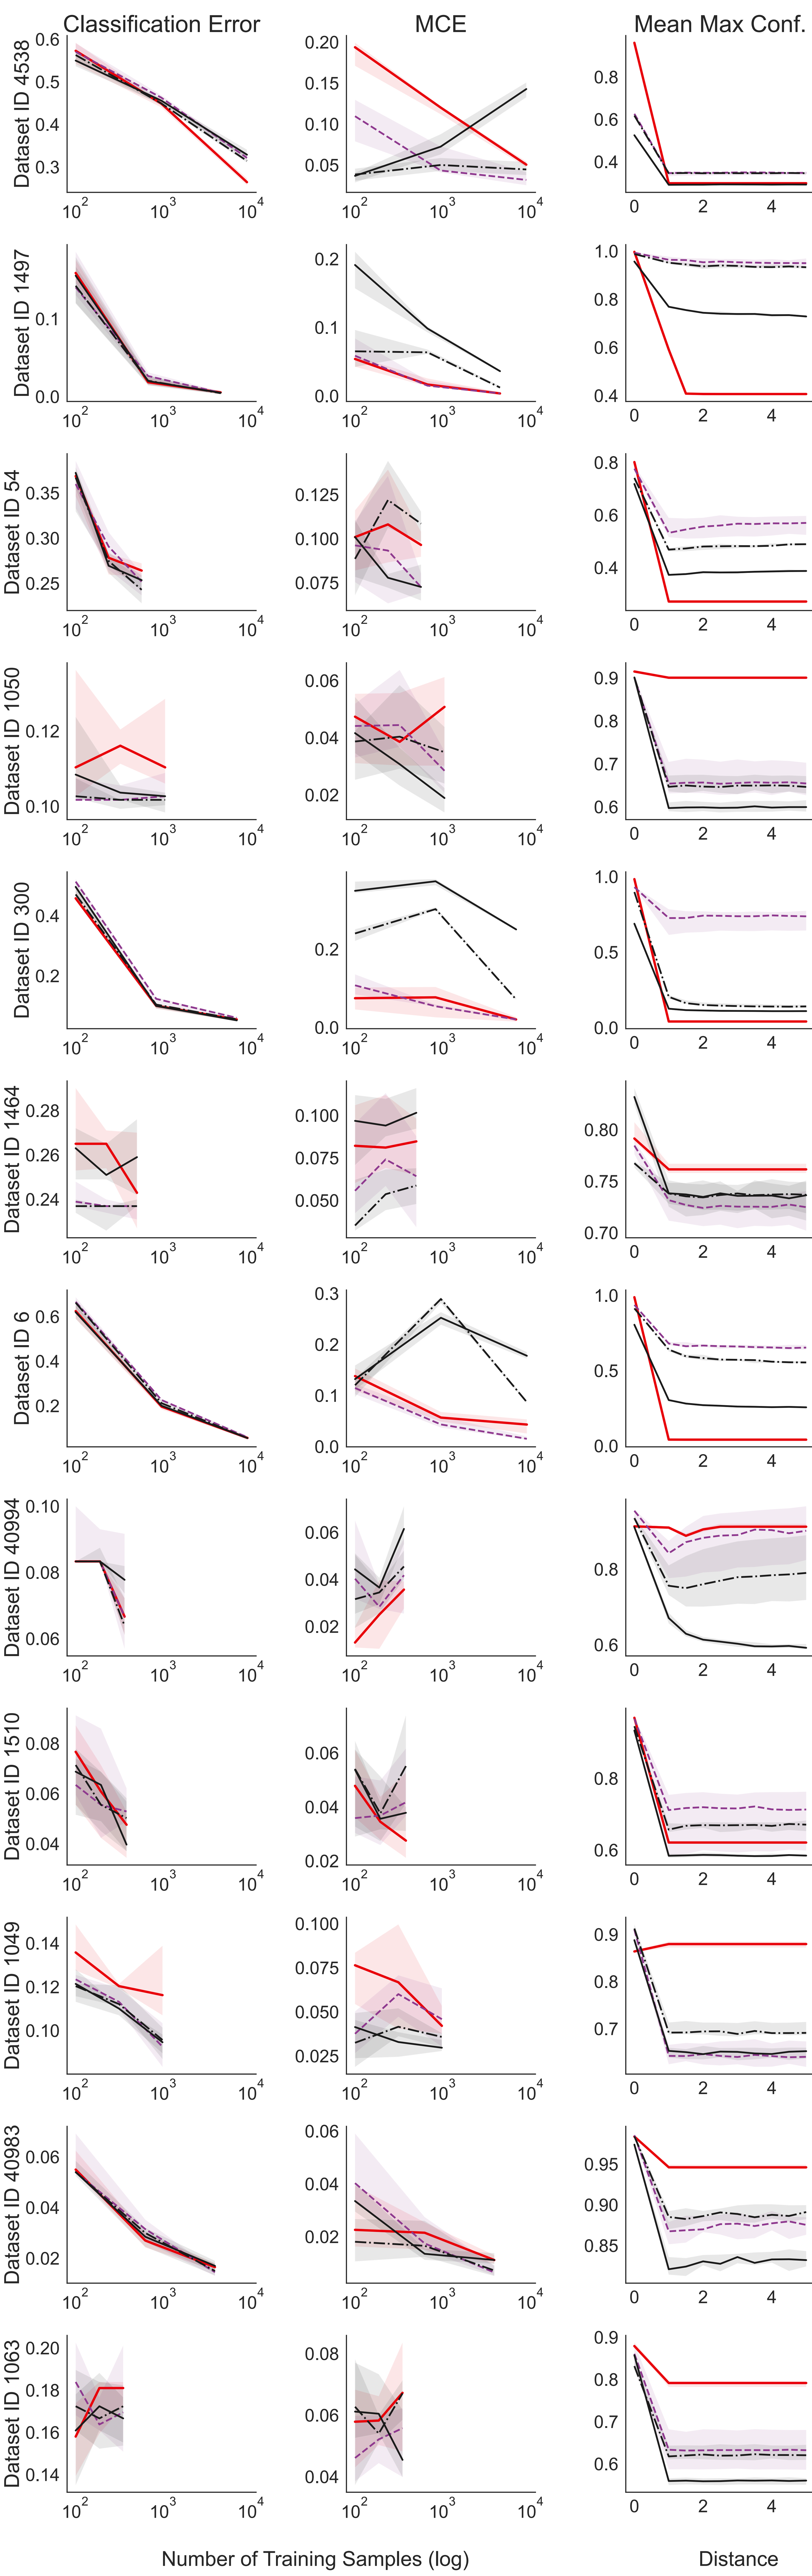

# KDN and DN

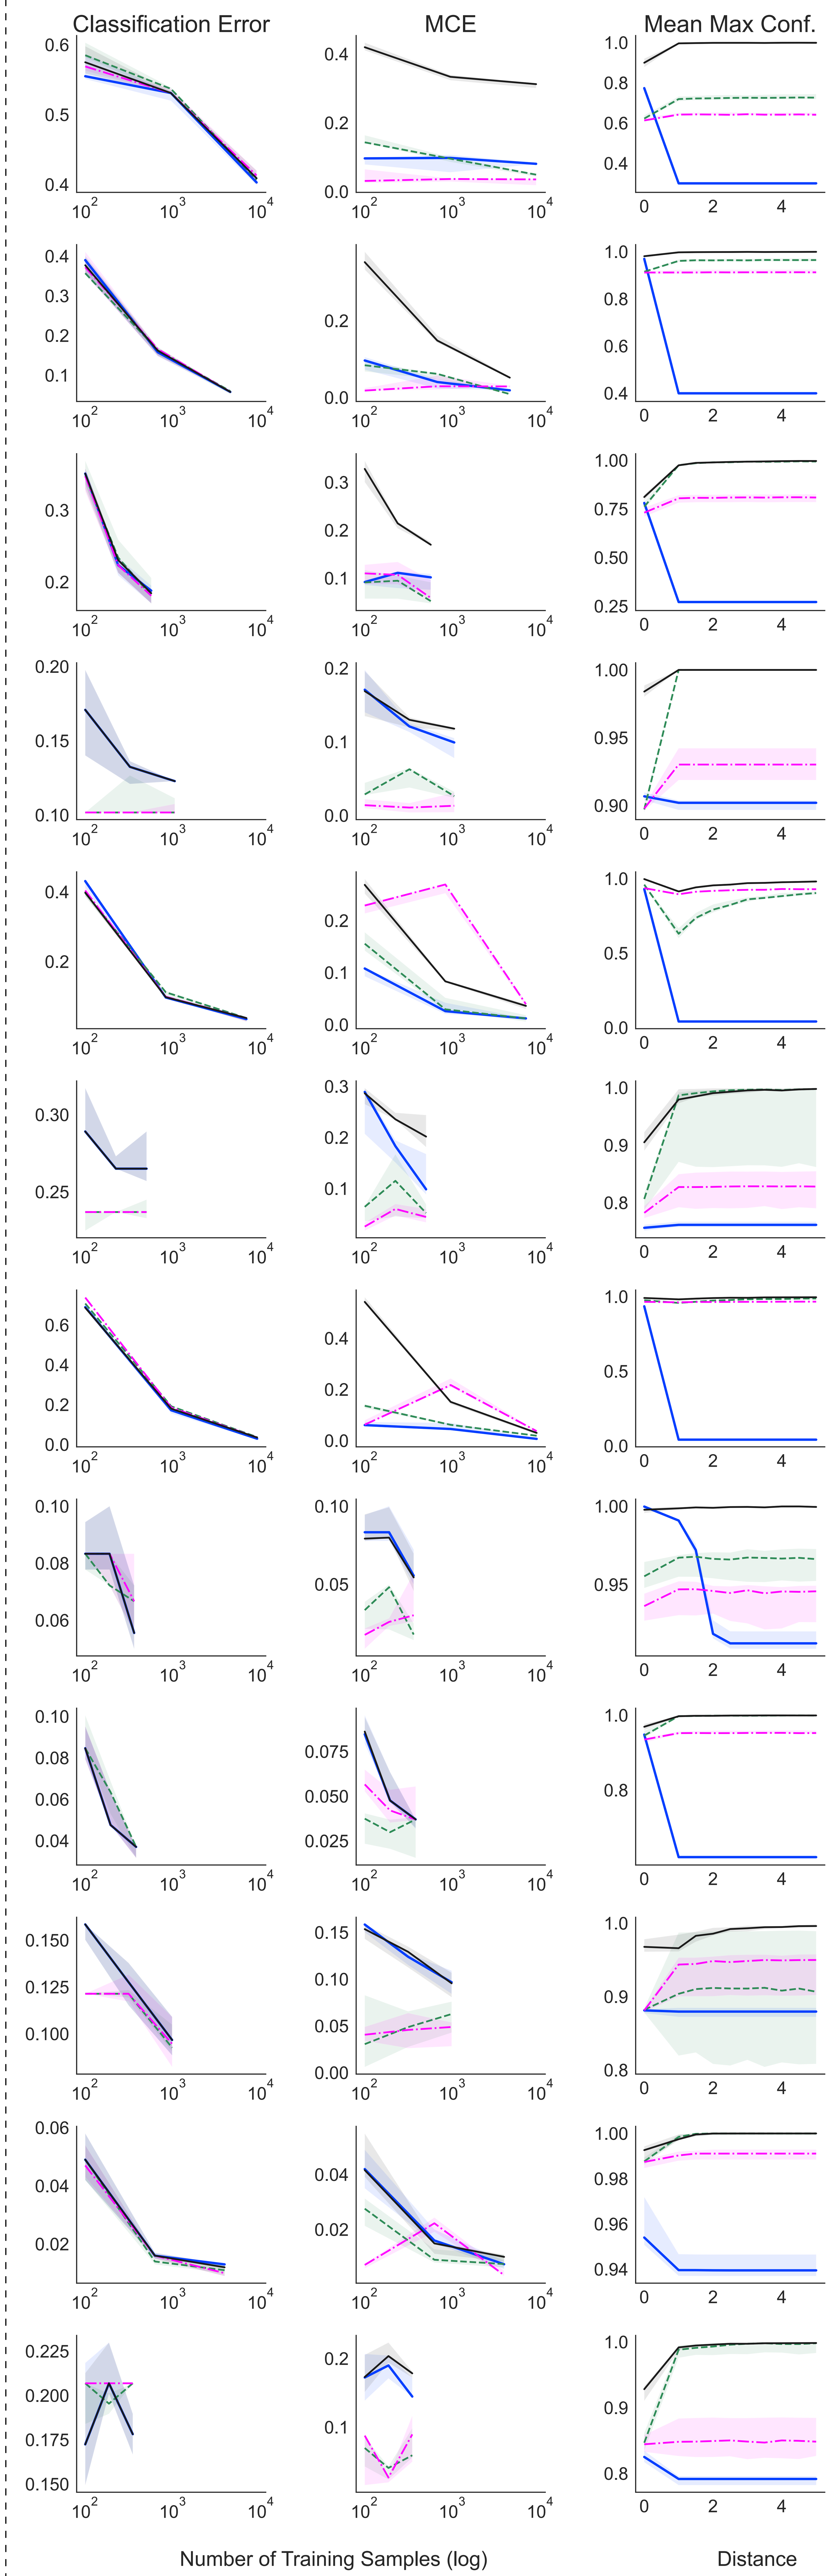

Supplement: supplementary_material [file attachment]
